# Supplementary material for: Causal Inference in Multisensory Heading Estimation
Source: PubMed Central journal article supplement (PMC5218471; doi:10.1371/journal.pone.0169676), 2017-01-06
Supplement: pone.0169676.s007.pdf [file pone.0169676.s007.pdf]

**S1 Appendix.** We define a measure of total variance  $\sigma_{tot.}^2$  as the integral of the circular variances  $\sigma_j^2$  of heading estimates over heading angles  $\theta_j$ , ranging between  $-\pi$  and  $\pi$ . The circular variance for a stimulus with heading angle  $\theta_j$  is defined as

$$\sigma_j^2 = 1 - |\rho_j| \tag{1}$$

where  $\rho_j$  is the first trigonometric moment,  $\rho_j = E \{e^{i\theta_j}; \theta_j \sim f_{VM}(\mu, \kappa)\}$ , which is calculated as

$$\rho_j = \int_{-\pi}^{\pi} e^{i\theta} f_{VM}(\theta; \mu, \kappa) d\theta \tag{1a}$$

where  $f_{VM}$  is the von Mises probability density function. This equation reduces to

$$\rho_j = \frac{e^{i\mu} I_1(\kappa)}{I_0(\kappa)}. \tag{1b}$$

$I_n$  is the modified Bessel function of order  $n$ . This equation implies that

$$|\rho_j| = \frac{I_1(\kappa)}{I_0(\kappa)} \tag{1c}$$

We calculated the approximate integral of this measure over the range of  $j$  using the trapezoidal method 'trapz' in MATLAB (The MathWorks Inc., Natick, United States, version 2014b):

$$\sigma_{tot.}^2 = \int_{-\pi}^{\pi} \left[ 1 - \frac{I_1(\kappa(\theta_j, \gamma_0, \gamma_1))}{I_0(\kappa(\theta_j, \gamma_0, \gamma_1))} \right] d\theta_j \tag{2}$$
