# Supplementary material for: Causal Inference in Multisensory Heading Estimation
Source: PLOS journal article supplement (doi:10.1371/journal.pone.0169676), 2017-01-06
Supplement: S1 (10.1371/journal.pone.0169676.s001) [file journal.pone.0169676.s001]

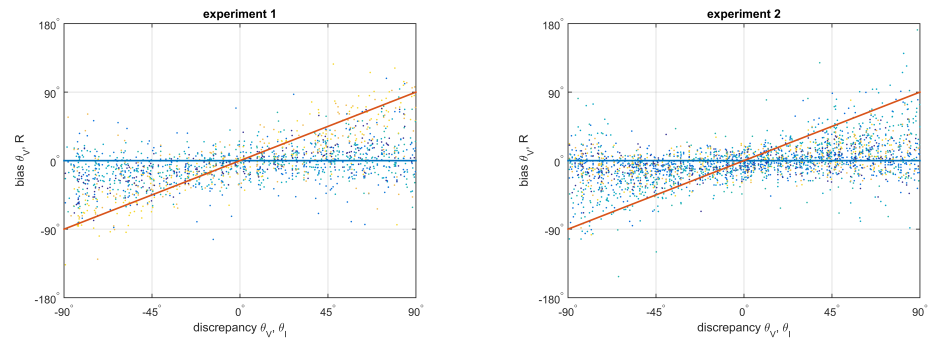

**Fig. 1.** Response bias as a function of discrepancy. Plots of the bias in responses relative to visual heading angle (dots) as a function of discrepancy between visual and inertial heading angle. Dots with different colors represent data from different participants. The horizontal blue line indicates a perfect theoretical correspondence between responses and the visual heading angle; the diagonal orange line indicates a perfect theoretical correspondence between responses and the inertial heading angle. Discrepancy is defined as the angular difference between visual and inertial heading angle; bias is defined as the angular difference between the visual heading angle and the response. Respectively, the corresponding calculations are:  $\text{Arg}(e^{i\theta_V}/e^{i\theta_I})$ , and  $\text{Arg}(e^{i\theta_V}/e^{i\theta_R})$ .

**S1 Figure.**
