# Supplementary material for: Causal Inference in Multisensory Heading Estimation
Source: PLoS One. 2017 Jan 6;12(1):e0169676. doi: 10.1371/journal.pone.0169676 (PMC5218471; doi:10.1371/journal.pone.0169676)
Supplement: S2 Table — Estimates of all unisensory model parameters β0, β1mT, γ0mT, and γ1mT, for modalities m visual and inertial, and T representing motion profile duration: 2, 4, or 6s. (XLSX) [file pone.0169676.s003.xlsx]

## Sheet: model coefficients
Unisensory model coefficients
		parameters
		β0	β1						γ0						γ1
			visual			inertial			visual			inertial			visual			inertial
experiment	participant		2s	4s	6s	2s	4s	6s	2s	4s	6s	2s	4s	6s	2s	4s	6s	2s	4s	6s
1	1	0.0685298	1.31386	1.31386	1.31386	1.00585	0.999275	1.7629	54.1814	54.1814	54.1814	26.6383	25.5143	20.3802	46.0179	46.0179	46.0179	16.8222	16.8222	16.8222
1	2	0.0598945	1.21235	1.21235	1.21235	1.06295	1.06295	1.06295	36.2289	36.2289	36.2289	172.178	40.8422	17.6314	25.4084	25.4084	25.4084	161.257	25.4325	4.11827
1	3	0.062823	1.19213	1.19213	1.19213	0.979666	0.979666	0.979666	58.438	58.438	58.438	35.1666	28.9587	23.5967	32.0916	32.0916	32.0916	18.7005	18.7005	18.7005
1	4	0.0676395	1.18985	1.18985	1.18985	1.15918	1.15918	1.15918	21.9377	21.9377	21.9377	15.0806	7.65635	6.88653	13.1395	13.1395	13.1395	4.47734	4.47734	4.47734
1	5	0.0584795	0.950929	0.950929	0.950929	0.829275	0.829275	0.829275	27.5733	27.5733	27.5733	44.0637	13.3617	11.0557	21.6297	21.6297	21.6297	40.5677	10.7299	8.96279
1	6	0.0677306	1.05413	1.05413	1.05413	1.01785	1.01785	1.01785	40.6797	40.6797	40.6797	28.1535	4.73875	5.21588	19.5402	19.5402	19.5402	24.626	-1.32076	3.218
1	7	0.0578859	1.05201	1.05201	1.05201	1.14425	1.14425	1.14425	61.9888	61.9888	61.9888	48.7895	48.7895	48.7895	38.2491	38.2491	38.2491	41.1472	41.1472	41.1472
1	8	0.0651023	1.28229	1.28229	1.28229	1.00988	1.00988	1.00988	73.5154	46.4754	41.9021	23.9399	23.9399	23.9399	17.5647	17.5647	17.5647	6.6976	6.6976	6.6976
2	1	0.0299138	0.851889	0.851889	0.851889	0.840581	0.840581	0.840581	30.1065	30.1065	30.1065	18.0497	18.0497	18.0497	11.1714	11.1714	11.1714	4.53962	4.53962	4.53962
2	2	0.0591741	1.00381	1.00381	1.00381	0.961602	0.961602	0.961602	86.626	86.626	86.626	47.9988	47.9988	47.9988	58.4502	58.4502	58.4502	40.7116	40.7116	40.7116
2	3	0.0207522	1.13014	1.13014	1.13014	0.859432	0.859432	0.859432	73.151	73.151	73.151	37.6466	37.6466	37.6466	65.3257	65.3257	65.3257	28.965	28.965	28.965
2	4	0.0866839	0.940349	0.940349	0.940349	0.674186	0.674186	0.674186	57.2533	57.2533	57.2533	37.1667	37.1667	37.1667	27.8195	27.8195	27.8195	29.8519	29.8519	29.8519
2	5	0.0844096	0.988628	0.988628	0.988628	0.878802	0.878802	0.878802	44.8736	44.8736	44.8736	25.6473	25.6473	25.6473	24.4655	24.4655	24.4655	15.2283	15.2283	15.2283
2	6	0.0243876	1.32871	1.32871	1.32871	1.30109	1.30109	1.30109	21.4713	21.4713	21.4713	44.1659	44.1659	44.1659	-13.8922	-13.8922	-13.8922	24.4308	24.4308	24.4308
2	7	0.0707608	1.30975	1.30975	1.30975	1.15636	1.15636	1.15636	81.0592	81.0592	81.0592	50.0475	50.0475	50.0475	61.7224	61.7224	61.7224	28.1015	28.1015	28.1015
2	8	0.0718518	0.987203	0.987203	0.987203	0.681746	0.681746	0.681746	3.40925	7.55377	17.1716	17.6381	17.6381	17.6381	-7.24201	-7.24201	-7.24201	5.74008	5.74008	5.74008
2	9	0.0181907	1.12498	1.12498	1.12498	0.876072	0.876072	0.876072	33.3464	33.3464	33.3464	22.8763	22.8763	22.8763	16.7159	16.7159	16.7159	14.4464	14.4464	14.4464
	median	0.062823	1.12498	1.12498	1.12498	0.979666	0.979666	0.979666	44.8736	44.8736	41.9021	35.1666	25.6473	23.5967	24.4655	24.4655	24.4655	24.4308	16.8222	15.2283
	average	0.0573064	1.11253	1.11253	1.11253	0.966987	0.9666	1.01152	47.4023	46.0556	46.3523	40.8969	29.1199	26.9843	26.9516	26.9516	26.9516	29.783	18.5119	17.4211
